# Supplementary material for: The yeast centrosome translates the positional information of the anaphase spindle into a cell cycle signal
Source: PubMed Central journal article supplement — J Cell Biol. 2007 Nov 5;179(3):423–36. doi: 10.1083/jcb.200705197 (PMC2064790; doi:10.1083/jcb.200705197), 2007-11-05
Supplement: jcellbiol_jcb.200705197_8.pdf [file jcellbiol_jcb.200705197_8.pdf]

Table S1. Yeast strains and plasmids

| Yeast strains | Genotype/construction                                                                                                                              | Source or reference        |
|---------------|----------------------------------------------------------------------------------------------------------------------------------------------------|----------------------------|
| A11993        | W303 <i>MATa ade2-1 leu2-3 ura3 his3-11,15 can1-100 GAL psi+ HA-BFA1 cdc15::CDC15-as1(L99G)::URA3</i>                                              | D'Aquino et al., 2005      |
| CLY169        | <i>MATa ura3-52 lys2-801 ade2-101 trp1Δ63 his3Δ200 leu2Δ1 cdc5-10</i>                                                                              | Pereira et al., 2002       |
| ESM356-1      | <i>MATa ura3-52 his3Δ200 trp1Δ63 leu2Δ1</i>                                                                                                        | Pereira et al., 2001       |
| ESM709        | <i>MATa ura3-52 lys2-801 ade2-101 trp1Δ63 his3Δ200 leu2Δ1::[spc72<sup>Δ176-230</sup> LEU2] Δspc72::kanMX6</i>                                      | Usui et al., 2003          |
| ESM888        | <i>MATa ura3-52 lys2-801 ade2-101 trp1Δ63 his3Δ200 leu2Δ1 Δkar9::klTRP1</i>                                                                        | Pereira et al., 2000       |
| ESM899        | <i>MATa ura3-52 his3Δ200 trp1Δ63 leu2Δ1 Δbfa1::kanMX6 Δkar9::klTRP1</i>                                                                            | Pereira et al., 2000       |
| ESM900        | <i>MATa ura3-52 lys2-801 ade2-101 trp1Δ63 his3Δ200 leu2Δ1 Δbub2::kanMX6 Δkar9::klTRP1</i>                                                          | Pereira et al., 2000       |
| ESM917        | <i>MATa ura3-52 lys2-801 ade2-101 trp1Δ63 his3Δ200 leu2Δ1::[ts-act5 LEU2] Δact5::klTRP1 Δkar9::HIS3MX6</i>                                         | This study                 |
| ESM1008       | <i>MATa ura3-52 lys2-801 ade2-101 trp1Δ63 his3Δ200 leu2Δ1 Δbfa1::kanMX6</i>                                                                        | Pereira et al., 2000       |
| ESM1278       | <i>MATa cdc15-1 ura3-52 lys2-801 ade2-101 trp1Δ63 his3Δ200 leu2Δ1</i>                                                                              | Pereira et al., 2002       |
| ESM2154       | <i>MATa ura3-52 lys2-801 ade2-101 trp1Δ63 his3Δ200 leu2Δ1 Δkar9::klTRP1 Δkin4::hphNT1</i>                                                          | Pereira and Schiebel, 2005 |
| ESM2197       | <i>MATa ura3-52 lys2-801 ade2-101 trp1Δ63 his3Δ200 leu2Δ1 spc72-7 Δkin4::hghNT</i>                                                                 | This study                 |
| ESM2204       | <i>MATa ura3-52 lys2-801 ade2-101 trp1Δ63 his3Δ200 leu2Δ1 KIN4-GFP-hghNT1 SPC42-eqFP611-natNT2</i>                                                 | Pereira and Schiebel, 2005 |
| ESM2263       | <i>MATa ura3-52 lys2-801 ade2-101 trp1Δ63 his3Δ200 leu2Δ1 Δkin4::hghNT1</i>                                                                        | Pereira and Schiebel, 2005 |
| ESM2492       | <i>MATa ura3-52 his3Δ200 trp1Δ63 leu2Δ1 CDC5-GFP-kanMX6 SPC42-eqFP611-hghNT1</i>                                                                   | This study                 |
| ESM2497       | <i>MATa ura3-52 lys2-801 ade2-101 trp1Δ63 his3Δ200 leu2Δ1 spc72-7 KIN4-GFP-hghNT1 SPC42-eqFP611-natNT2</i>                                         | This study                 |
| K699          | W303 <i>MATa ade2-1 trp1-1 can1-100 leu2-3, -112 his3-11, -15 ura3</i>                                                                             | K. Nasmyth                 |
| KCY2          | <i>MATa ura3-52 lys2-801 ade2-101 trp1Δ63 his3Δ200 leu2Δ1::[nud1-2 LEU2] Δnud1::kanMX6</i>                                                         | Gruneberg et al., 2000     |
| KAY12         | <i>MATa ura3-52 lys2-801 ade2-101 trp1Δ63 his3Δ200 leu2Δ1 Δbub2::URA3</i>                                                                          | Pereira et al., 2000       |
| MGY96         | Expresses <i>GST-CDC5<sup>ΔN70 S165D T238D</sup></i>                                                                                               | S. Sedgwick                |
| MGY97         | Expresses <i>GST-CDC5<sup>ΔN70 N209A</sup></i>                                                                                                     | S. Sedgwick                |
| SHM1314       | <i>MATa ura3-52 his3Δ200 trp1Δ63 leu2Δ1 HIS3-pGal1-3HA-KIN4</i>                                                                                    | This study                 |
| SHM1326       | <i>MATa ura3-52 his3Δ200 trp1Δ63 leu2Δ1 SPC42-eqFP611-kanMX6 natNT2-P<sub>GALI</sub>-GFP-KIN4-pr-LEU2</i>                                          | This study                 |
| SHM1327       | <i>MATa ura3-52 his3Δ200 trp1Δ63 leu2Δ1 SPC42-eqFP611-kanMX6 natNT2-P<sub>GALI</sub>-GFP-KIN4-pr-SS-LEU2</i>                                       | This study                 |
| SHM1346       | <i>MATa ura3-52 his3Δ200 trp1Δ63 leu2Δ1 Δkin4B::HIS3MX6::[KIN4-3HA-hphNT1 LEU2]</i>                                                                | This study                 |
| SHM1347       | <i>MATa ura3-52 his3Δ200 trp1Δ63 leu2Δ1 Δkin4B::HIS3MX6::[KIN4<sup>T209A</sup>-3HA-hphNT1 LEU2]</i>                                                | This study                 |
| SHM1378       | <i>MATa ura3-52 his3Δ200 trp1Δ63 leu2Δ1 Δdyn1::klTRP1 CDC5-GFP-hphNT1 SPC42-eqFP611-kanMX6</i>                                                     | This study                 |
| SHM1447       | <i>MATa ura3-52 his3Δ200 trp1Δ63 leu2Δ1 Δbfa1::hphNT1 HIS3-P<sub>GALI</sub>-3HA-KIN4</i>                                                           | This study                 |
| SHM1448       | <i>MATa ura3-52 lys2-801 ade2-101 trp1Δ63 his3Δ200 leu2Δ1::[SPC72 LEU2] Δspc72::kanMX6 KIN4-GFP-hphNT1 SPC42-eqFP611-natNT2</i>                    | This study                 |
| SHM1449       | <i>MATa ura3-52 lys2-801 ade2-101 trp1Δ63 his3Δ200 leu2Δ1::[spc72<sup>Δ176-230</sup> LEU2] Δspc72::kanMX6 KIN4-GFP-hphNT1 SPC42-eqFP611-natNT2</i> | This study                 |
| SHM1512       | <i>MATa ura3-52 lys2-801 ade2-101 trp1Δ63 his3Δ200 leu2Δ1::[spc72<sup>Δ176-230</sup> LEU2] Δspc72::kan Δkar9::TRP1</i>                             | This study                 |
| SHM1515       | <i>MATa ura3-52 lys2-801 ade2-101 trp1Δ63 his3Δ200 leu2Δ1 Δdyn1::klTRP1</i>                                                                        | This study                 |
| SHM1550       | <i>MATa ura3-52 lys2-801 ade2-101 trp1Δ63 his3Δ200 leu2Δ1 Δdyn1::klTRP1 Δkin4::HIS3MX6</i>                                                         | This study                 |
| SHM1551       | <i>MATa ura3-52 lys2-801 ade2-101 trp1Δ63 his3Δ200 leu2Δ1 Δdyn1::klTRP1 Δbub2::HIS3MX6</i>                                                         | This study                 |
| SHM1570       | <i>MATa ura3-52 lys2-801 ade2-101 trp1Δ63 his3Δ200 leu2Δ1 Δdyn1::klTRP1 Δbfa1::HIS3MX6</i>                                                         | This study                 |
| SHM1575       | W303 <i>MATa ade2-1 leu2-3 ura3 his3-11,15 can1-100 GAL psi+ HA-BFA1 cdc15::CDC15-as1(L99G)::URA3 pGal1-KIN4-LEU2</i>                              | This study                 |
| SHM1584       | <i>MATa ura3-52 lys2-801 ade2-101 trp1Δ63 his3Δ200 leu2Δ1 Δdyn1::klTRP1 KIN4-pr-LEU2</i>                                                           | This study                 |
| SHM1585       | <i>MATa ura3-52 lys2-801 ade2-101 trp1Δ63 his3Δ200 leu2Δ1 Δdyn1::klTRP1 KIN4-pr-SS-LEU2</i>                                                        | This study                 |
| SHM1586       | <i>MATa ura3-52 lys2-801 ade2-101 trp1Δ63 his3Δ200 leu2Δ1 Δbfa1::kanMX6::[BFA1 LEU2]</i>                                                           | This study                 |
| SHM1587       | <i>MATa ura3-52 lys2-801 ade2-101 trp1Δ63 his3Δ200 leu2Δ1 Δbfa1::kanMX6::[BFA1<sup>2A</sup> LEU2]</i>                                              | This study                 |
| SHM1589       | <i>MATa ura3-52 lys2-801 ade2-101 trp1Δ63 his3Δ200 leu2Δ1 Δdyn1::klTRP1 Δbfa1::HIS3::[BFA1 LEU2]</i>                                               | This study                 |
| SHM1590       | <i>MATa ura3-52 lys2-801 ade2-101 trp1Δ63 his3Δ200 leu2Δ1 Δdyn1::klTRP1 Δbfa1::HIS3::[BFA1<sup>2A</sup> LEU2]</i>                                  | This study                 |
| SHM1597       | <i>MATa ura3-52 lys2-801 ade2-101 trp1Δ63 his3Δ200 leu2Δ1 Δbfa1::kanMX6::[BFA1-3HA-klTRP1 LEU2]</i>                                                | This study                 |
| SHM1598       | <i>MATa ura3-52 lys2-801 ade2-101 trp1Δ63 his3Δ200 leu2Δ1 Δbfa1::kanMX6::[BFA1<sup>2A</sup>-3HA-klTRP1 LEU2]</i>                                   | This study                 |
| SHM1605       | <i>MATa ura3-52 his3Δ200 trp1Δ63 leu2Δ1 HIS3-P<sub>GALI</sub>-3HA-KIN4 Δbfa1::hphNT1::[BFA1 LEU2]</i>                                              | This study                 |
| SHM1606       | <i>MATa ura3-52 his3Δ200 trp1Δ63 leu2Δ1 HIS3-P<sub>GALI</sub>-3HA-KIN4 Δbfa1::hphNT1::[BFA1<sup>2A</sup> LEU2]</i>                                 | This study                 |
| SHM1617       | <i>MATa ura3-52 his3Δ200 trp1Δ63 leu2Δ1 kan-P<sub>GALI</sub>-GST-KIN4</i>                                                                          | This study                 |
| SHM1618       | <i>MATa ura3-52 his3Δ200 trp1Δ63 leu2Δ1 Δkin4::HIS3MX6::[kan-P<sub>GALI</sub>-GST-KIN4<sup>T209A</sup> LEU2]</i>                                   | This study                 |
| SHM1620       | <i>MATa ura3-52 lys2-801 ade2-101 trp1Δ63 his3Δ200 leu2Δ1 Δbfa1::kanMX6::[BFA1-GFP-hphNT1 LEU2]</i>                                                | This study                 |
| SHM1621       | <i>MATa ura3-52 lys2-801 ade2-101 trp1Δ63 his3Δ200 leu2Δ1 Δbfa1::kanMX6::[BFA1<sup>2A</sup>-GFP-hphNT1 LEU2]</i>                                   | This study                 |
| SHM1748       | <i>MATa ura3-52::[mCherry-Tub1 URA3] his3Δ200 trp1Δ63 leu2Δ1 SPC42-4xhcRed-kanMX6</i>                                                              | This study                 |
| SHM1749       | <i>MATa ura3-52::[mCherry-Tub1 URA3] his3Δ200 trp1Δ63 leu2Δ1 SPC42-4xhcRed-kanMX6 Δkin4::HIS3MX6::[KIN4-SPB LEU2]</i>                              | This study                 |
| SHM1753       | <i>MATa ura3-52::[mCherry-Tub1 URA3] his3Δ200 trp1Δ63 leu2Δ1 SPC42-4xhcRed-kanMX6 Δkin4::HIS3MX6::[KIN4-SPB LEU2] Δbfa1::klTRP1</i>                | This study                 |
| SHM1760       | <i>MATa ura3-52 lys2-801 ade2-101 trp1Δ63 his3Δ200 leu2Δ1 Δbfa1::kanMX6::[BFA1<sup>2A</sup>-3HA-klTRP1 LEU2] HIS3-P<sub>GALI</sub>-CDC5</i>        | This study                 |
| SHM1761       | <i>MATa ura3-52 his3Δ200 trp1Δ63 leu2Δ1 SPC42-4xhcRed-kanMX6 Δkin4::HIS3MX6::[KIN4-SPB-GFP-klTRP1 LEU2]</i>                                        | This study                 |
| YPH499        | <i>MATa ura3-52 lys2-801 ade2-101 trp1Δ63 his3Δ200 leu2Δ1</i>                                                                                      | Sikorski and Hieter, 1989  |
| YMK205        | <i>MATa ura3-52 lys2-801 ade2-101 trp1Δ63 his3Δ200 leu2Δ1 spc72-7</i>                                                                              | Knop and Schiebel, 1998    |

## Plasmids

|              |                                                                                     |                           |
|--------------|-------------------------------------------------------------------------------------|---------------------------|
| pAK11        | pRS306 carrying <i>mCherry-Tub1</i>                                                 | Khmelinskii et al., 2007  |
| pBJ781       | pRS305 carrying temperature-sensitive- <i>act5</i>                                  | Muhua et al., 1998        |
| pCL43        | pGEX-5x-1 carrying <i>CDC5</i>                                                      | This study                |
| pGEX-5x-1    | <i>E.coli</i> expression vector carrying GST under the control of the lacZ promoter | GE Healthcare             |
| pGP68        | pGEX-5x-1 carrying <i>SPC72</i> <sup>1-271</sup>                                    | Knop and Schiebel, 1998   |
| pHM152       | pRS305 carrying <i>KIN4</i> <sup>614-800</sup> - <i>pr</i>                          | This study                |
| pHM153       | pRS305 carrying <i>KIN4</i> <sup>614-800</sup> - <i>pr-SS</i>                       | This study                |
| pHM164       | pRS305 carrying <i>KIN4</i>                                                         | This study                |
| pHM165       | pRS305 carrying <i>KIN4</i> <sup>T209A</sup>                                        | This study                |
| pHM169       | pRS305 carrying <i>KIN4-SPC72</i> <sup>177-622</sup>                                | This study                |
| pHM191       | pGEX-5x-1 carrying <i>SPC72</i> <sup>Δ1-98</sup>                                    | This study                |
| pHM224-21    | pRS305 carrying <i>BFA1</i>                                                         | This study                |
| pHM225-29    | pRS305 carrying <i>BFA1</i> <sup>S150A S180A</sup>                                  | This study                |
| pHM229-11    | pRS305 carrying <i>BFA1</i> <sup>S150A S180A S490A</sup>                            | This study                |
| pHM238-10    | pMal-2c carrying <i>BFA1</i> <sup>S150A S180A S490A</sup>                           | This study                |
| pHM240-3     | pMal-2c carrying <i>BFA1</i> <sup>S150A S180A</sup>                                 | This study                |
| pMal-2c      | <i>E.coli</i> expression vector carrying MBP under the control of the tac promoter  | New England Biolabs, Inc. |
| pMal-2c-BFA1 | pMal-2c carrying <i>BFA1</i>                                                        | S. Sedgwick               |
| pMal-2c-TEM1 | pMal-2c carrying <i>TEM1</i>                                                        | S. Sedgwick               |
| pMK298       | pGEX-5x-1 carrying <i>NUD1</i> <sup>1-435</sup>                                     | This study                |
| pSM413       | pGEX-4T-1 carrying <i>SPC72</i> <sup>1-622</sup>                                    | This study                |
| pSM447       | pRS316 carrying <i>SPC72</i>                                                        | Knop and Schiebel, 1998   |
| pTH158       | pMal-2c carrying <i>BUB2</i>                                                        | Höfken et al., 2004       |
| pTU48-1      | pGEX-5x-1 carrying <i>SPC72</i> <sup>Δ176-230</sup>                                 | Usui et al., 2003         |

K. Nasmyth, University of Oxford, Oxford, UK. S. Sedgwick, National Institute for Medical Research, London, UK. NatNT2 encodes the *Streptomyces noursei* *nat1* gene. *klTRP1* encodes the *Kluyveromyces lactis* *TRP1* gene. *hphNT1* encodes the *E. coli* *hph* gene.

## References

- D'Aquino, K.E., F. Monje-Casas, J. Paulson, V. Reiser, G.M. Charles, L. Lai, K.M. Shokat, and A. Amon. 2005. The protein kinase Kin4 inhibits exit from mitosis in response to spindle position defects. *Mol. Cell.* 19:223–234.
- Gruneberg, U., K. Campbell, C. Simpson, J. Grindlay, and E. Schiebel. 2000. Nud1p links astral microtubule organization and the control of exit from mitosis. *EMBO J.* 19:6475–6488.
- Höfken, T., and E. Schiebel. 2004. Novel regulation of mitotic exit by the Cdc42 effectors Gic1 and Gic2. *J. Cell Biol.* 164:219–231.
- Khmelinskii, A., C. Lawrence, J. Roostal, and E. Schiebel. 2007. Cdc14-regulated midzone assembly controls anaphase B. *J. Cell Biol.* 177:981–993.
- Knop, M., and E. Schiebel. 1998. Receptors determine the cellular localization of a gamma-tubulin complex and thereby the site of microtubule formation. *EMBO J.* 17:3952–3967.
- Muhua, L., N.R. Adams, M.D. Murphy, C.S. Shields, and J.A. Cooper. 1998. A cytokinesis checkpoint requiring the yeast homologue of an APC-binding protein. *Nature.* 393:487–491.
- Pereira, G., and E. Schiebel. 2005. Kin4 kinase delays mitotic exit in response to spindle alignment defects. *Mol. Cell.* 19:209–221.
- Pereira, G., T. Höfken, J. Grindlay, C. Manson, and E. Schiebel. 2000. The Bub2p spindle checkpoint links nuclear migration with mitotic exit. *Mol. Cell.* 6:1–10.
- Pereira, G., T.U. Tanaka, K. Nasmyth, and E. Schiebel. 2001. Modes of spindle pole body inheritance and segregation of the Bfa1p/Bub2p checkpoint protein complex. *EMBO J.* 20:6359–6370.
- Pereira, G., C. Manson, J. Grindlay, and E. Schiebel. 2002. Regulation of the Bfa1p-Bub2p complex at spindle pole bodies by the cell cycle phosphatase Cdc14p. *J. Cell Biol.* 157:367–379.
- Sikorski, R.S., and P. Hieter. 1989. A system of shuttle vectors and yeast host strains designed for efficient manipulation of DNA in *Saccharomyces cerevisiae*. *Genetics.* 122:19–27.
- Usui, T., H. Maekawa, G. Pereira, and E. Schiebel. 2003. The XMAP215 homologue Stu2 at yeast spindle pole bodies regulates microtubule dynamics and anchorage. *EMBO J.* 22:4779–4793.
